# Supplementary material for: LC-MS/MS Characterization of Phenolic Metabolites and Their Antioxidant Activities from Australian Native Plants
Source: MDPI journal article supplement (doi:10.3390/metabo12111016), 2022-10-24
Supplement: s1 [file s1]

## Supplementary Material

### LC-MS/MS Characterization of Phenolic Metabolites and Their Antioxidant Activities from Australian Native Plants

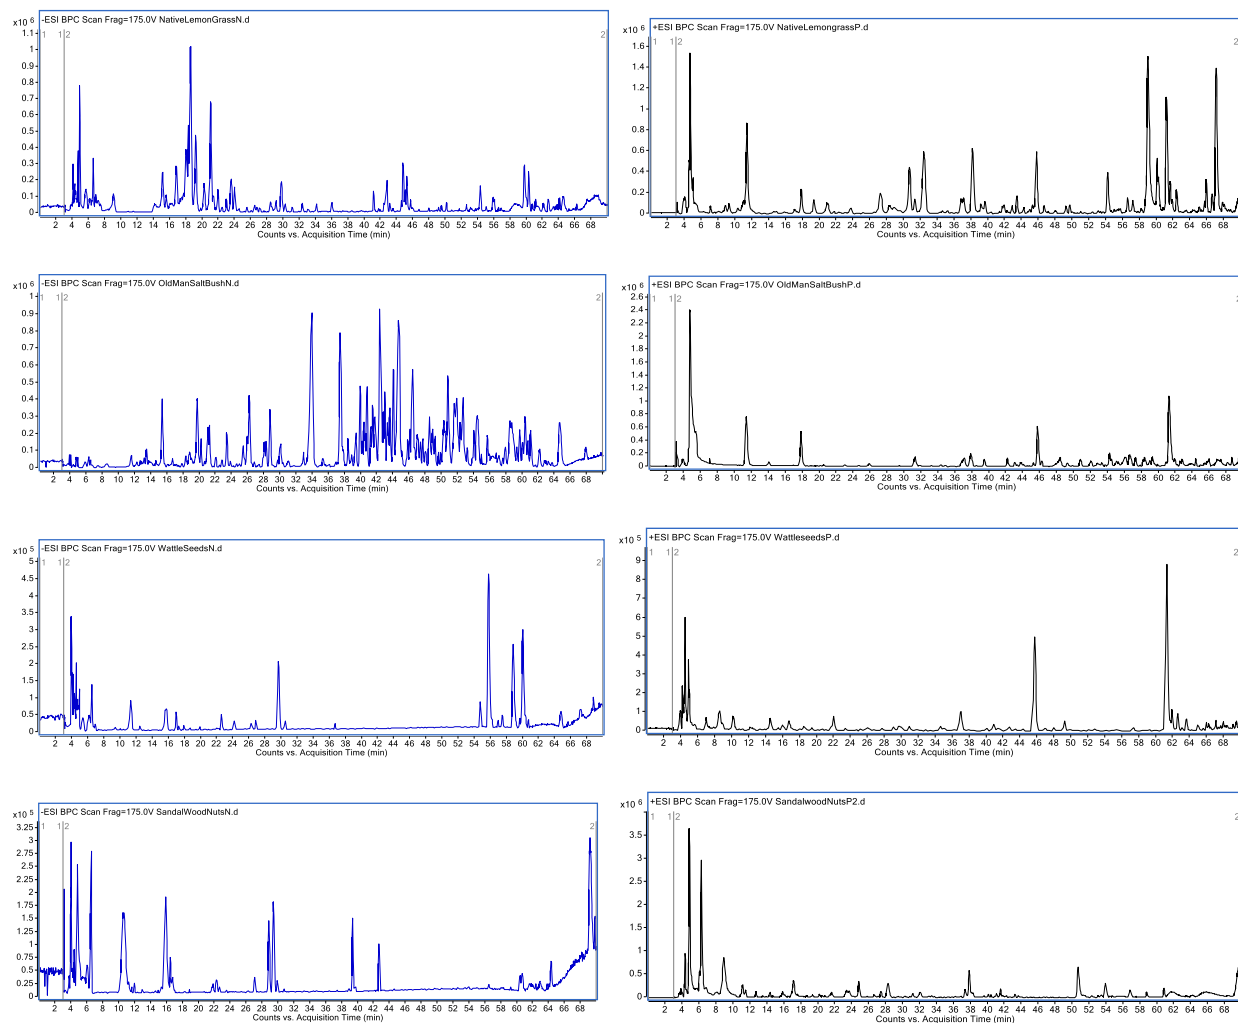

**Figure S1.** Base Peak Chromatograms (BPC) of Australian native lemon grass, Oldman saltbush, wattle seeds, and sandalwood nuts in positive (black) and negative (blue) modes.

## Compound 1

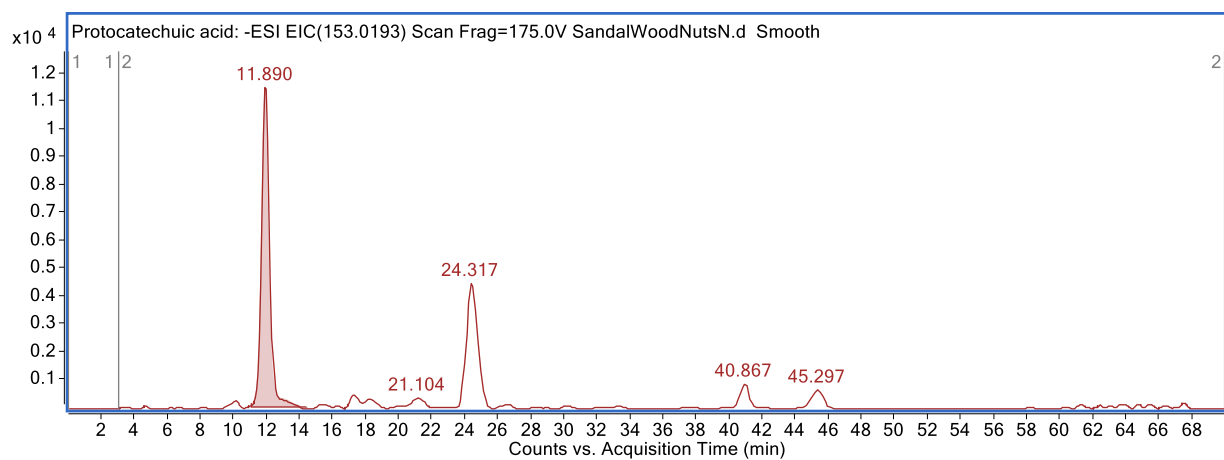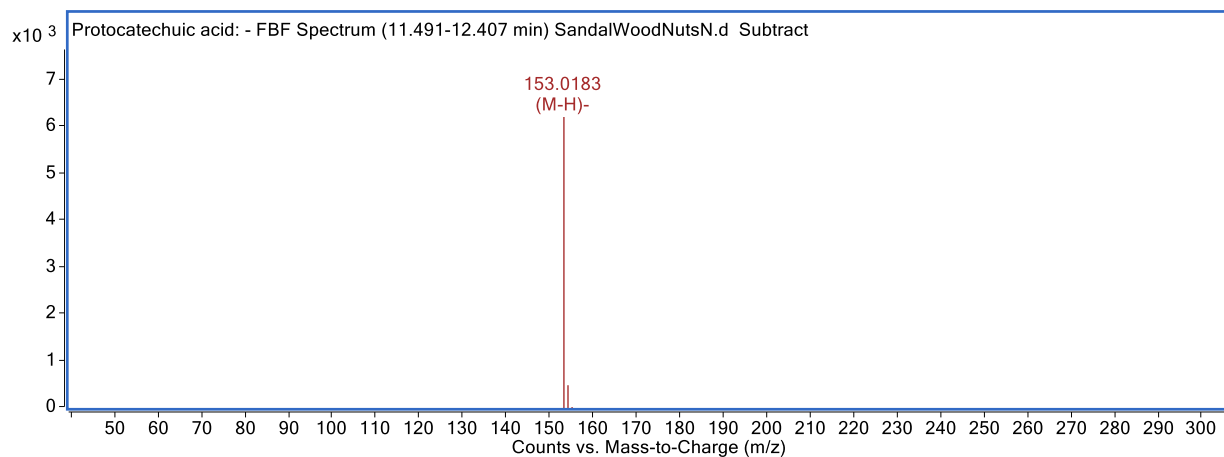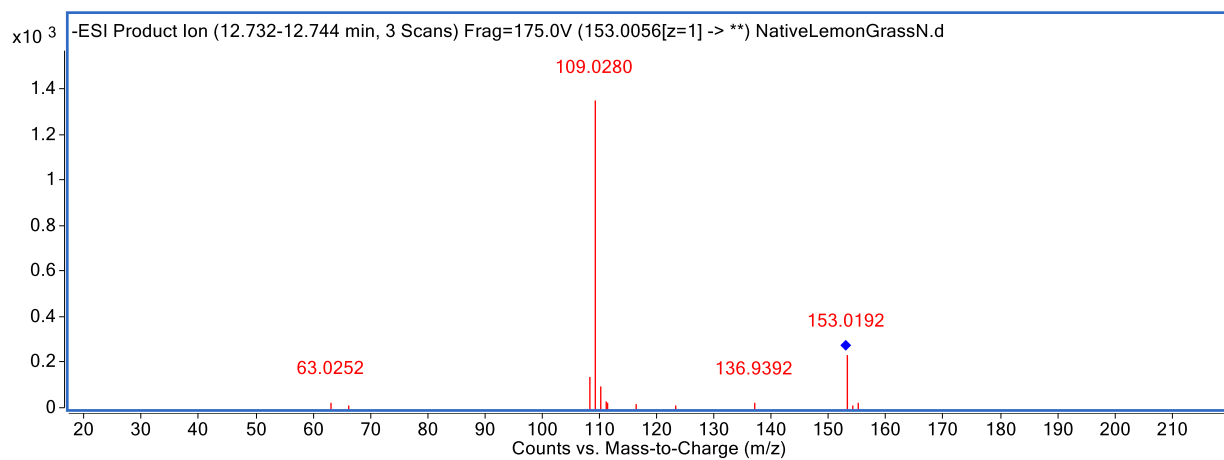

## Compound 4

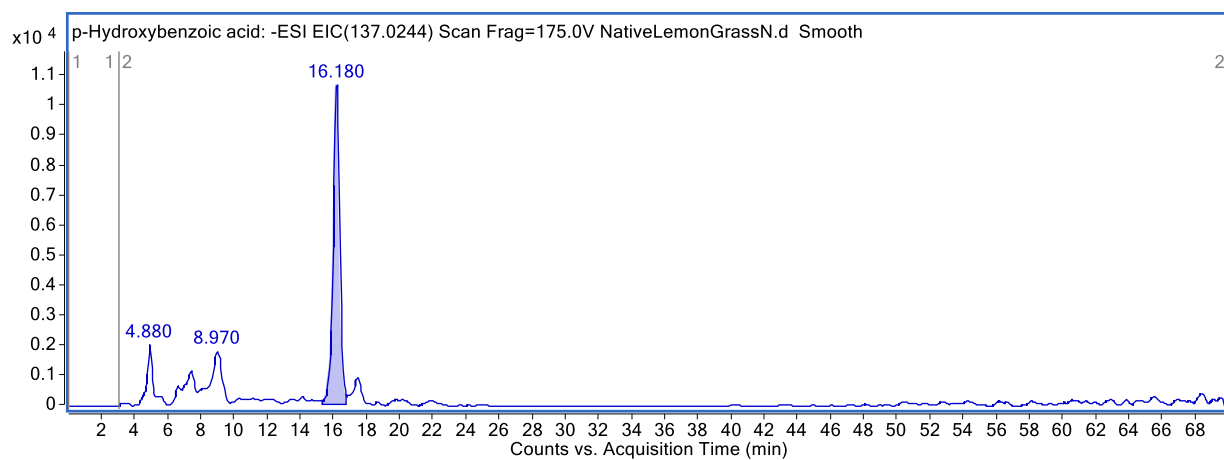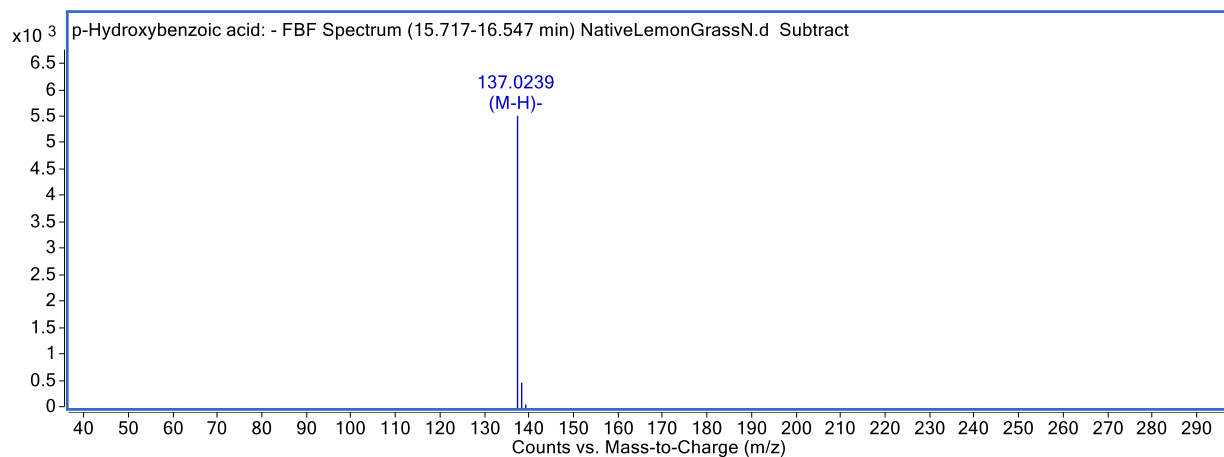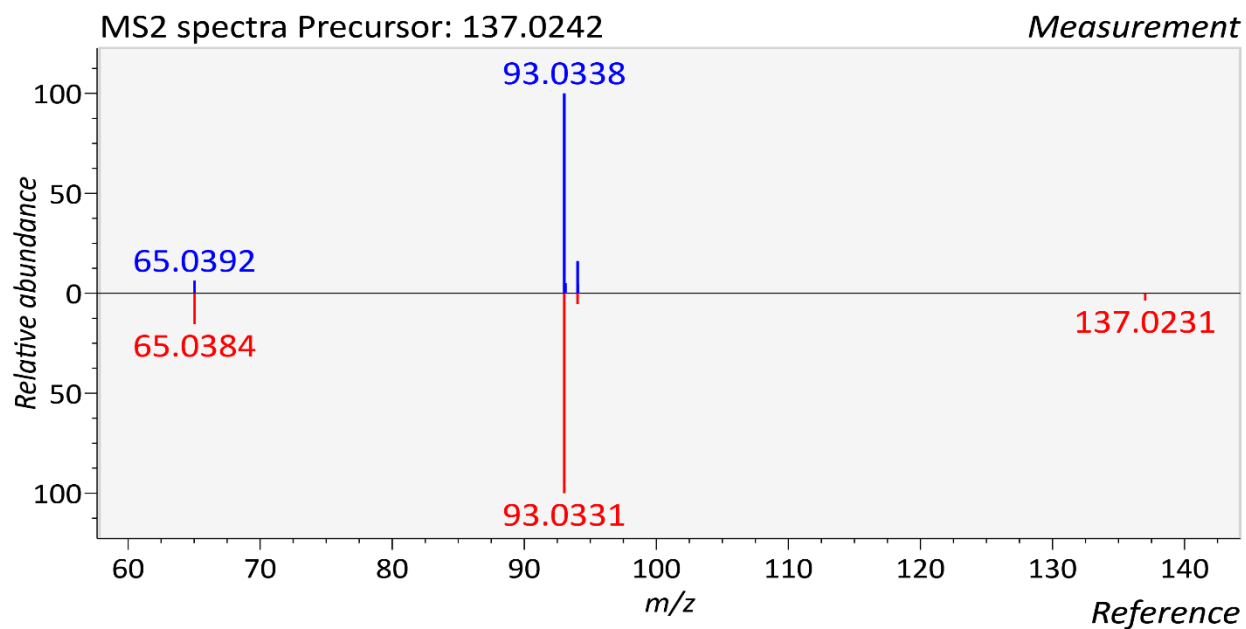

## Compound 16

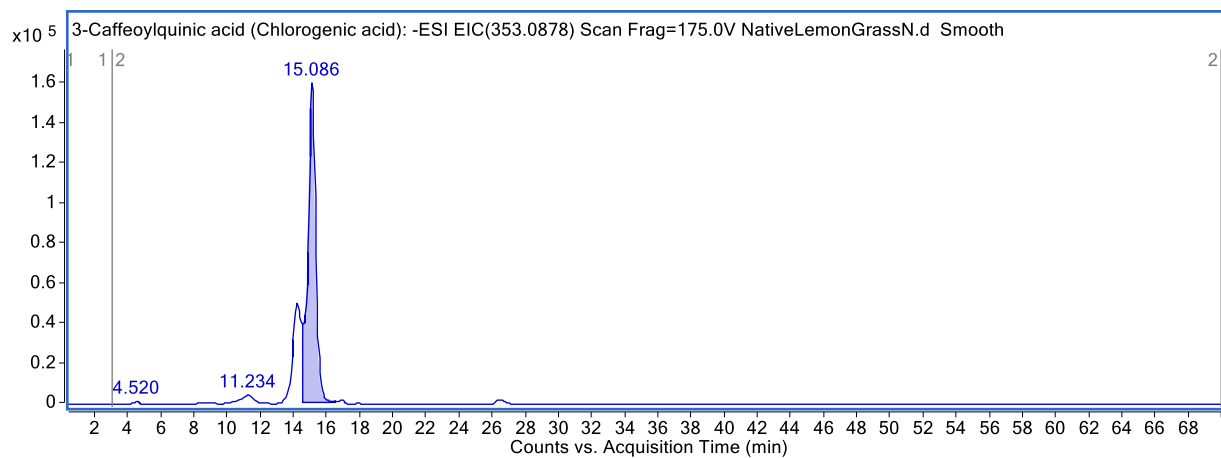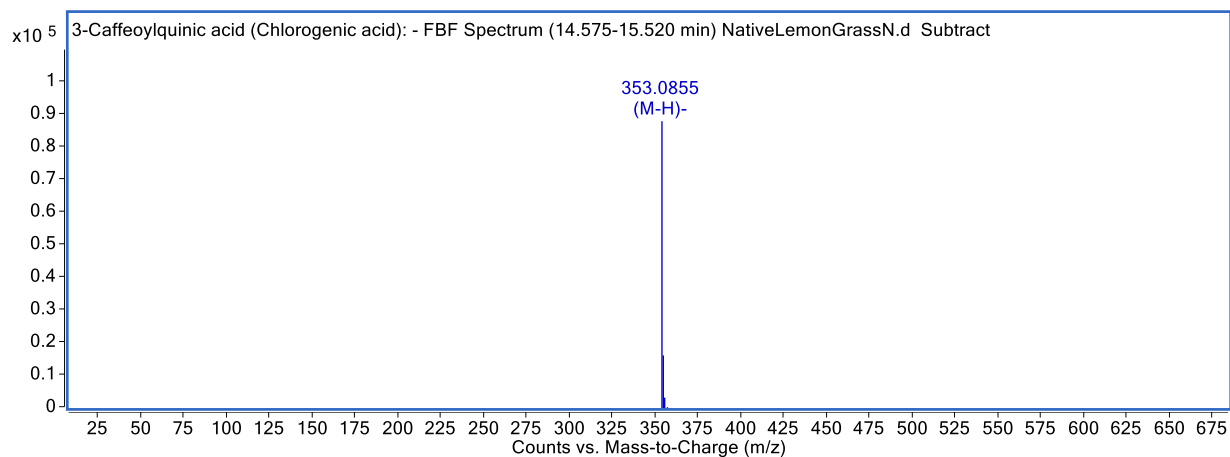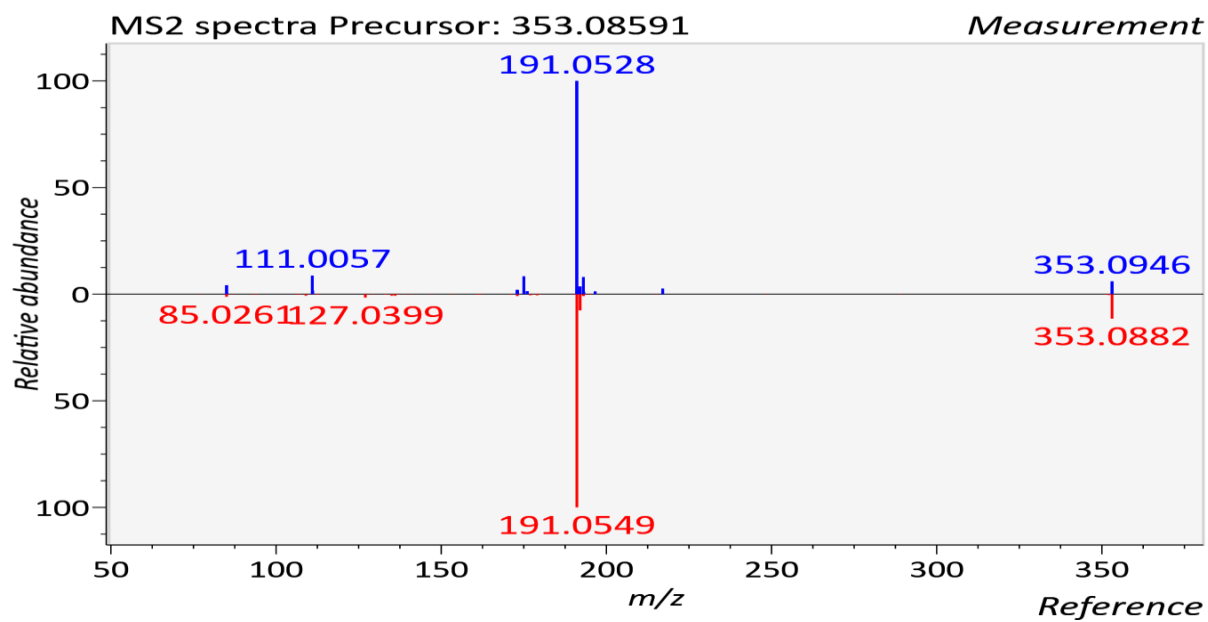

## Compound 18

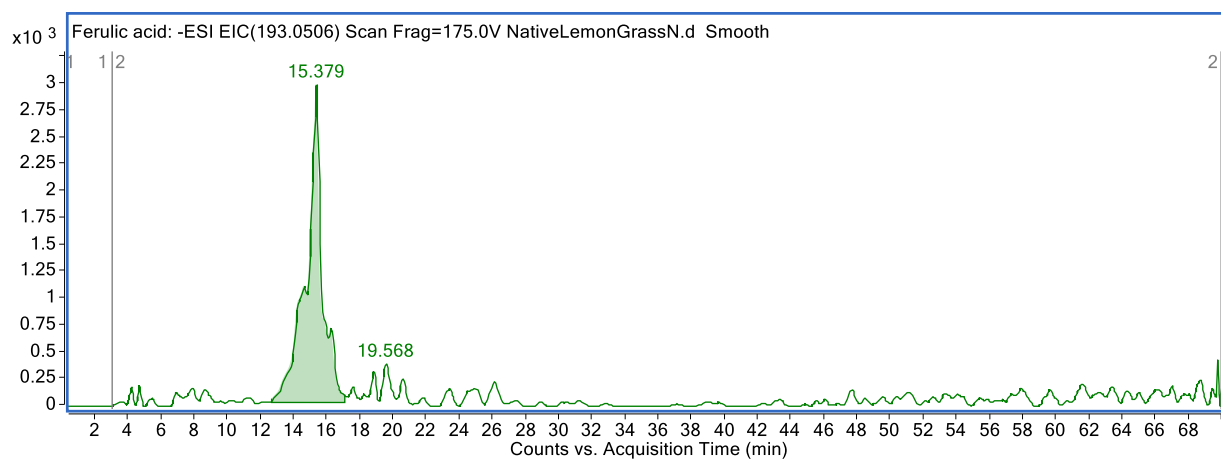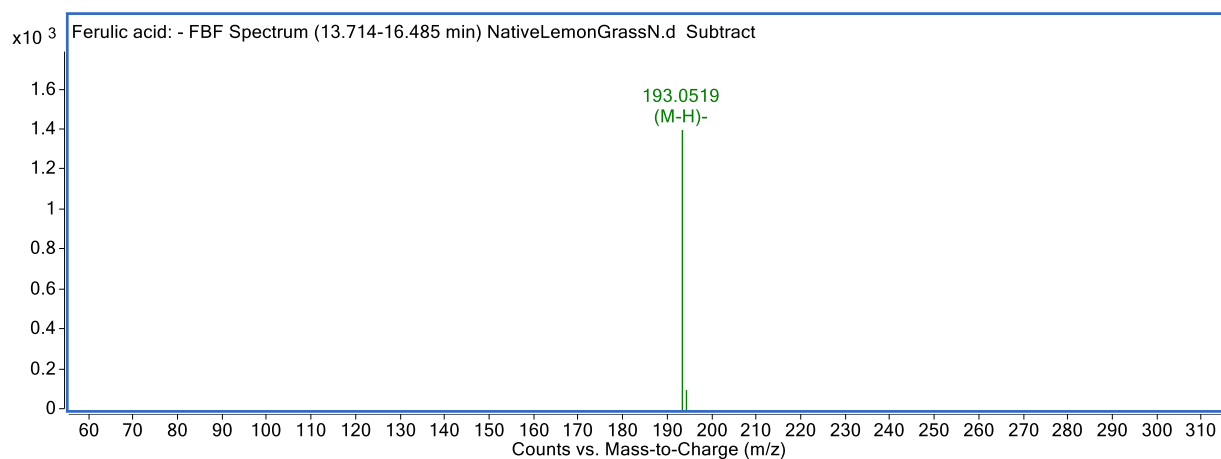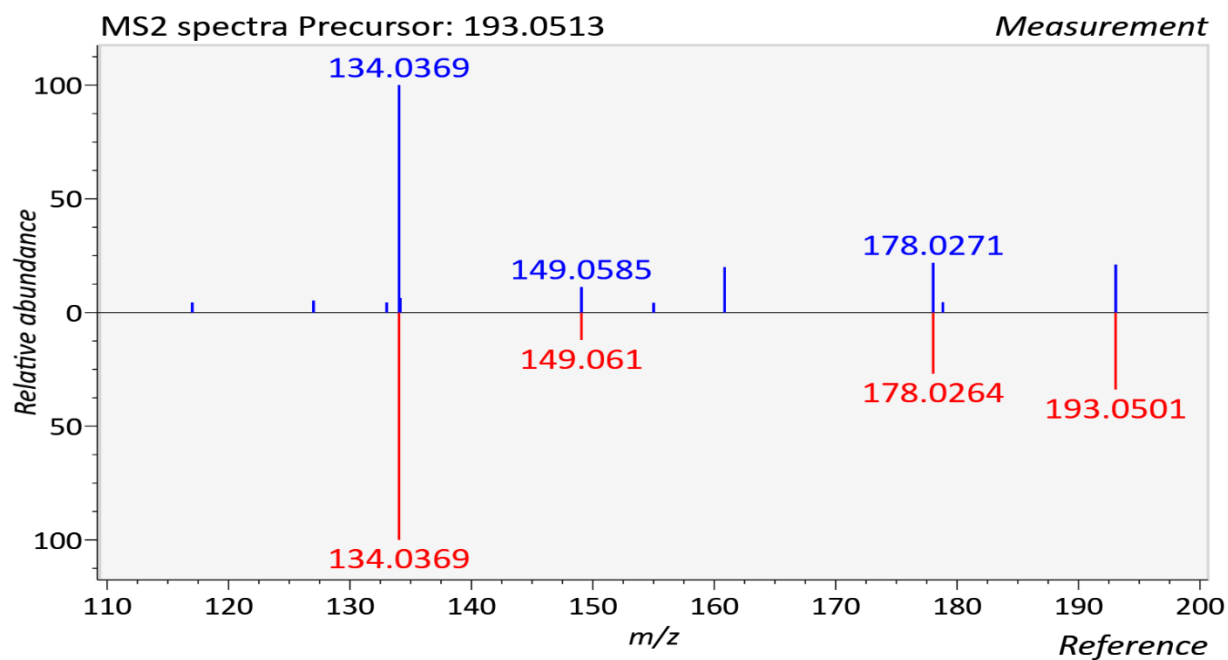

## Compound 21

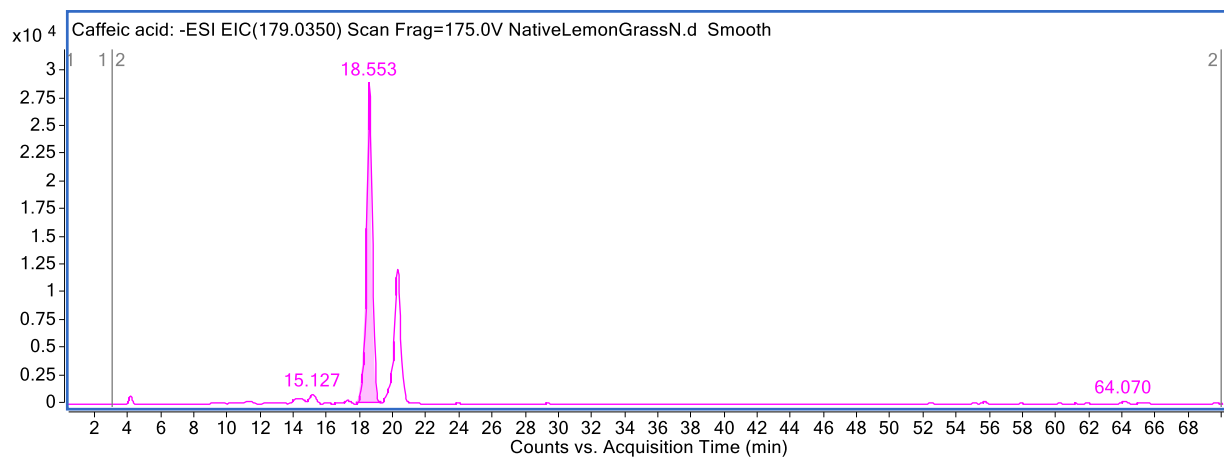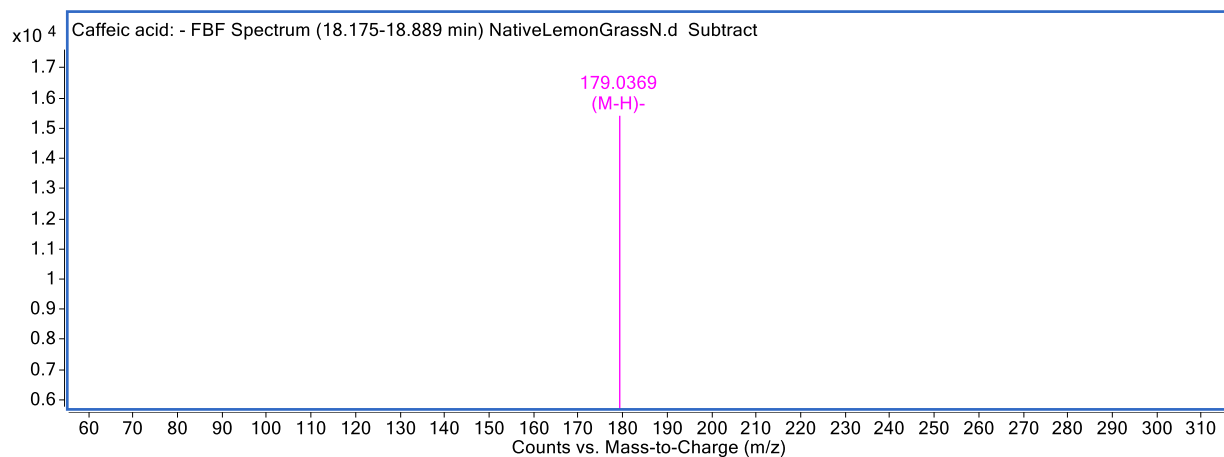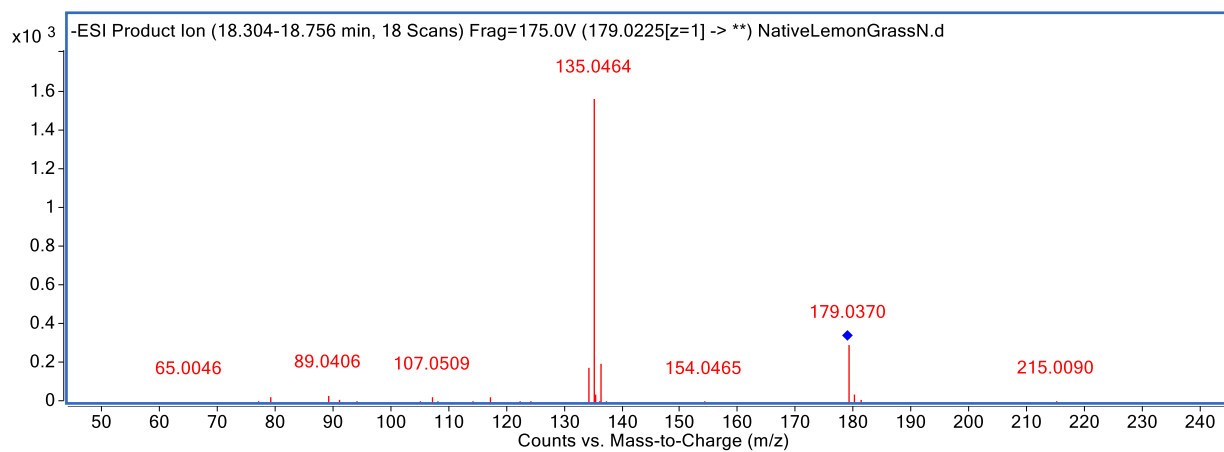

## Compound 22

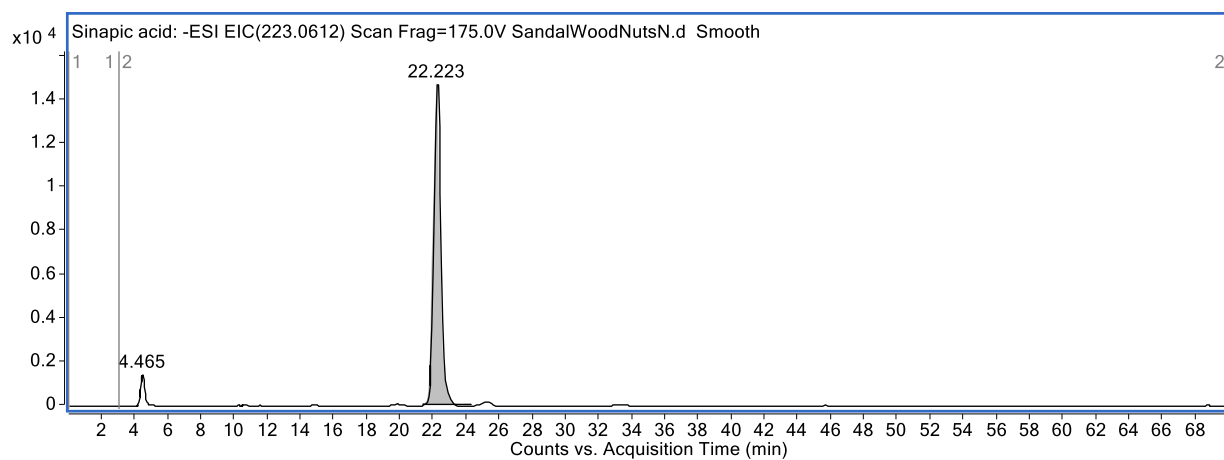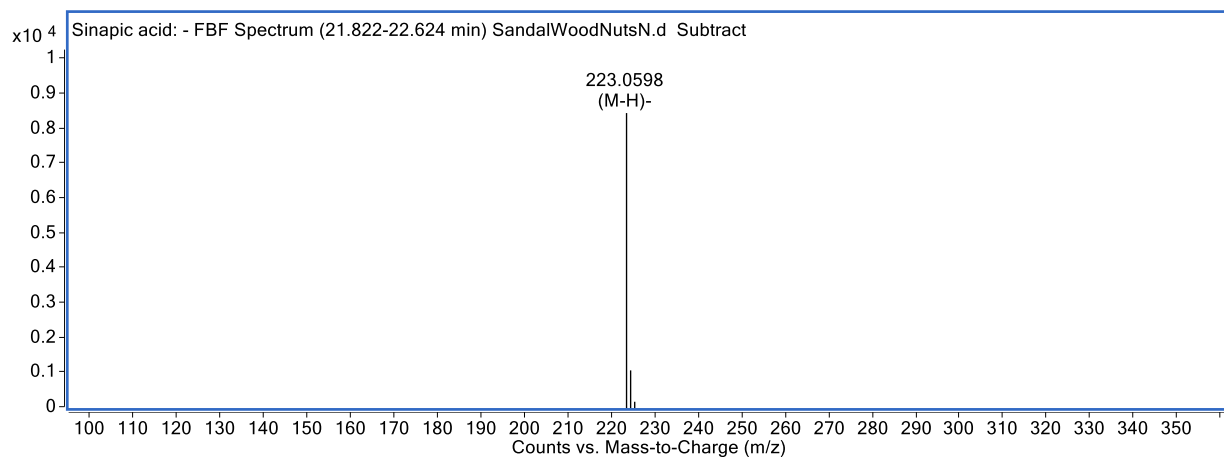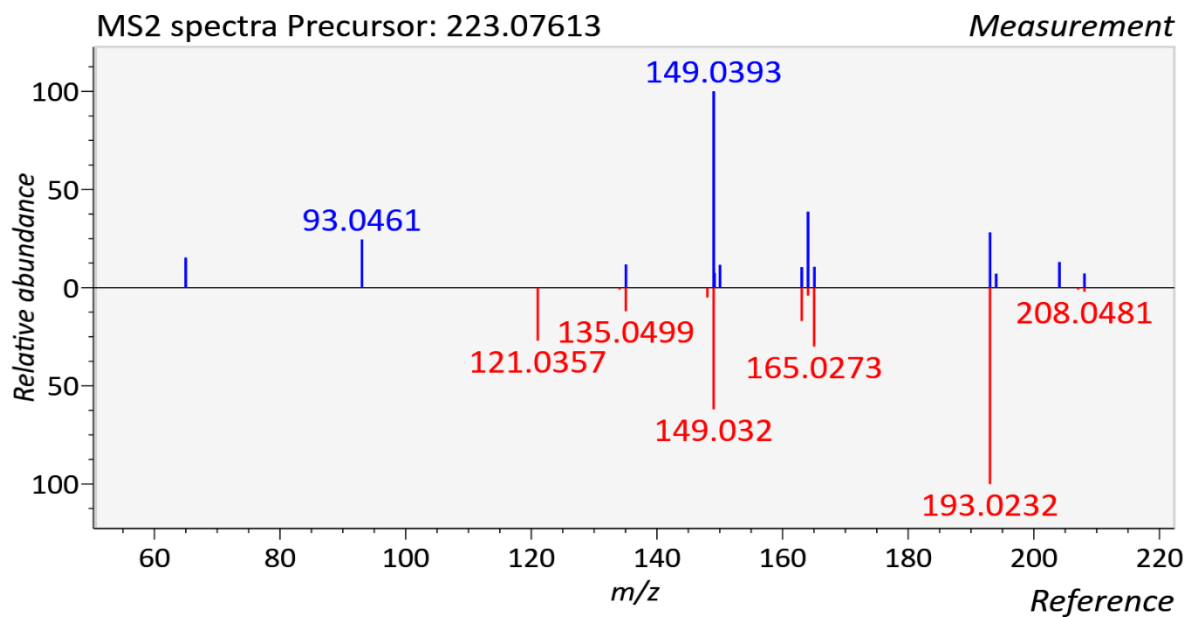

## Compound 23

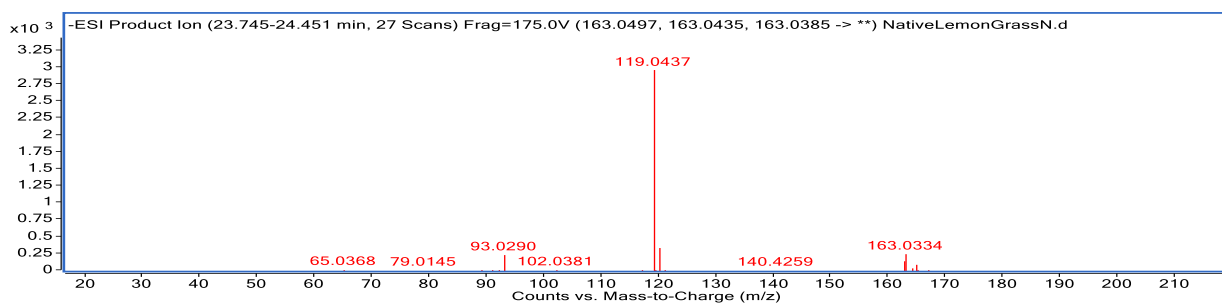

## Compound 28

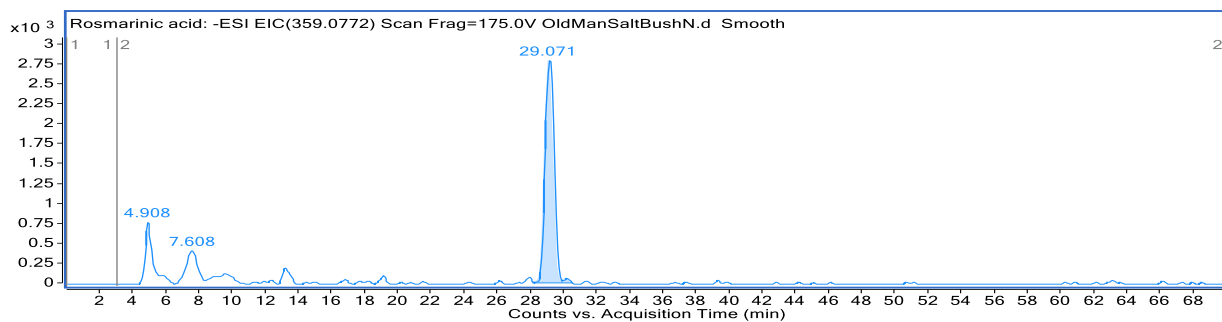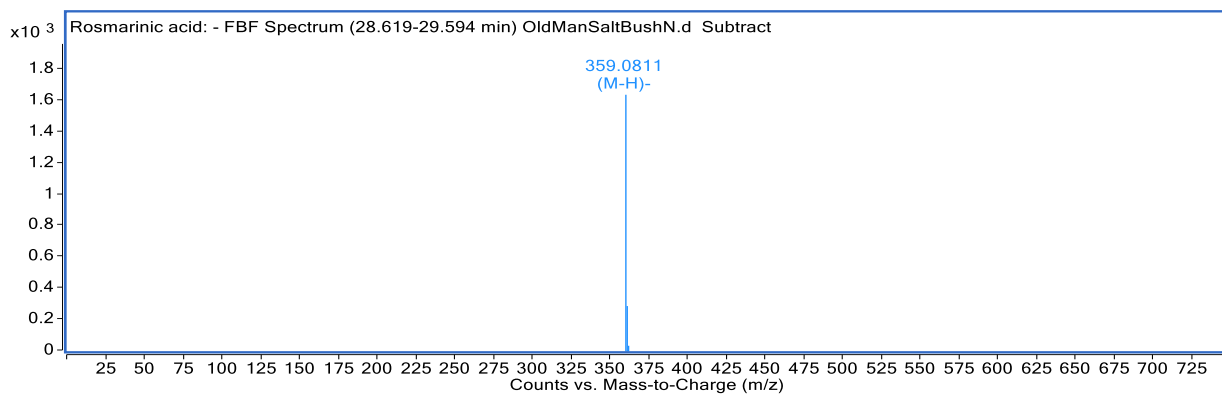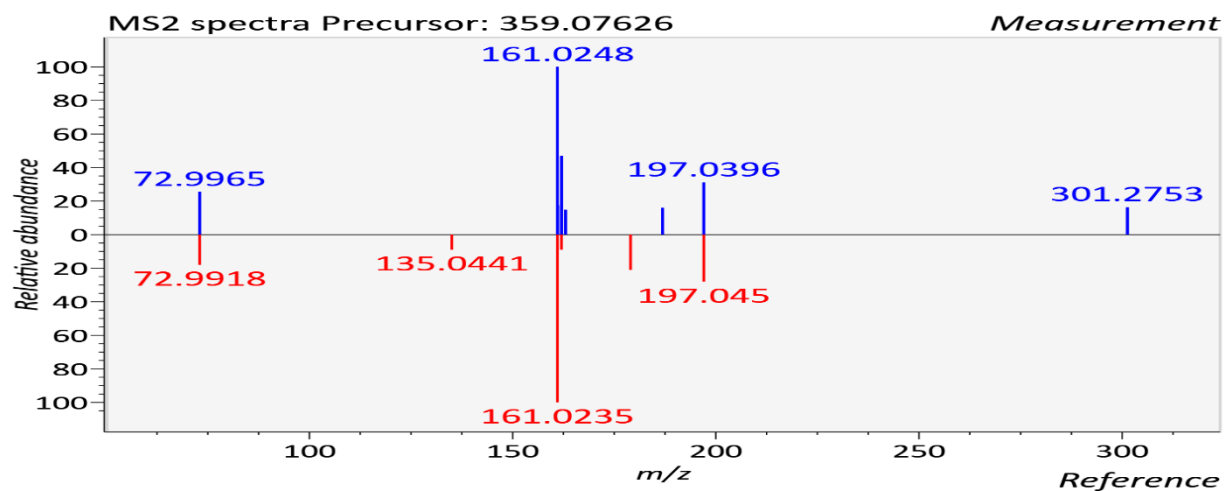



## Compound 42

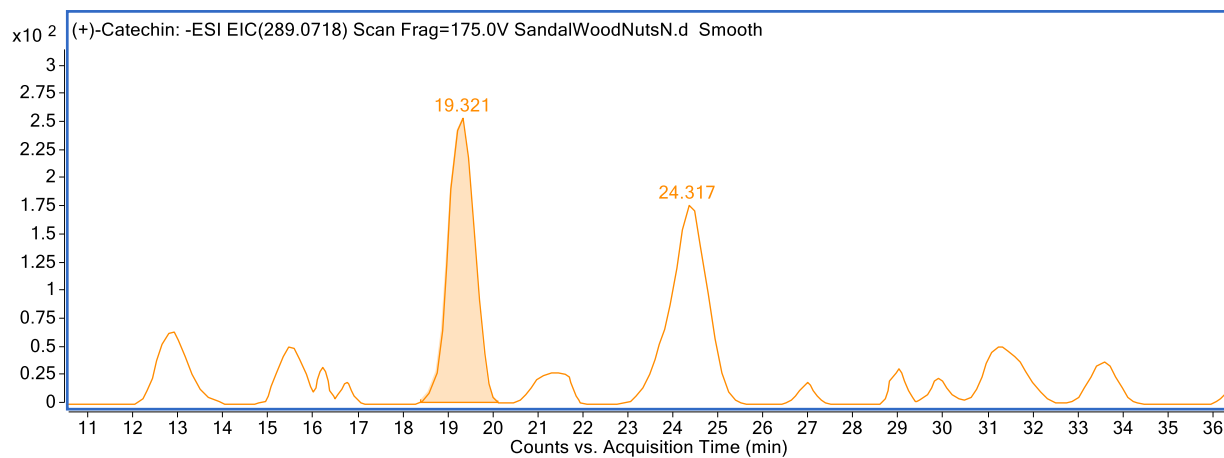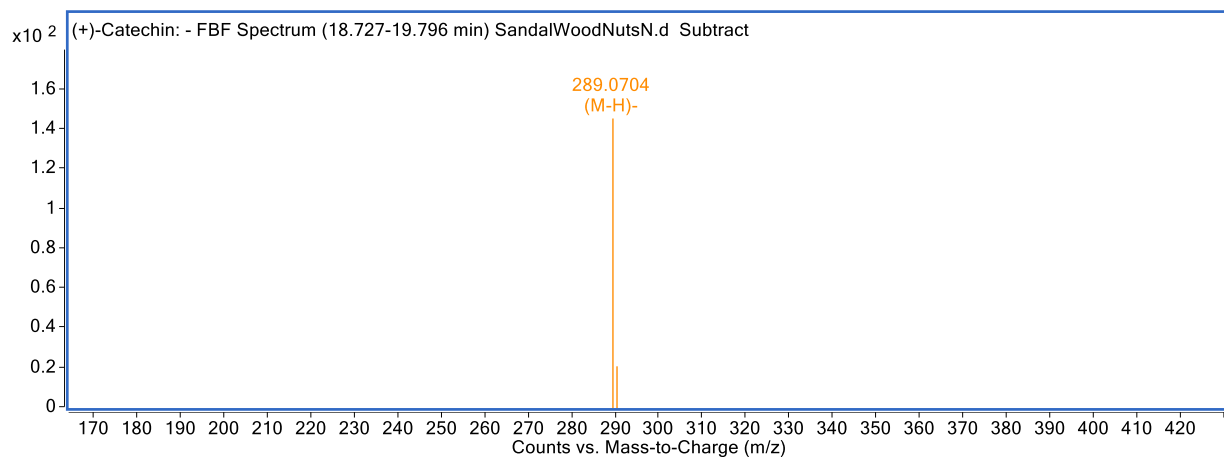

## Compound 46

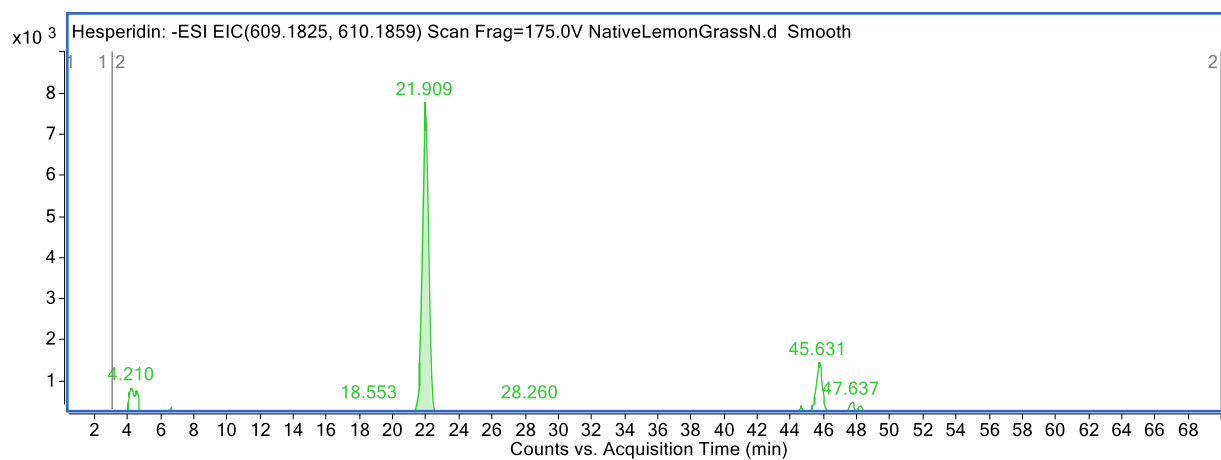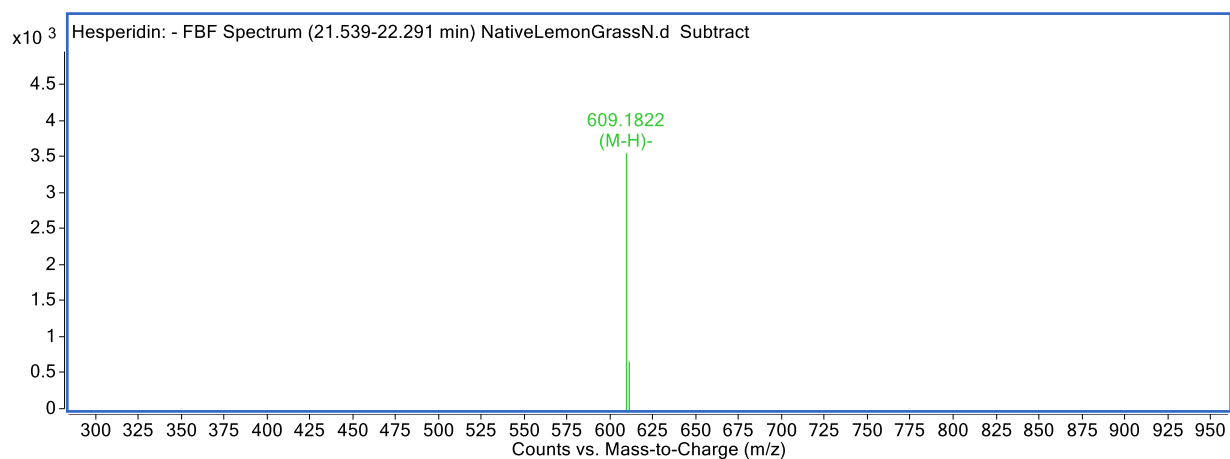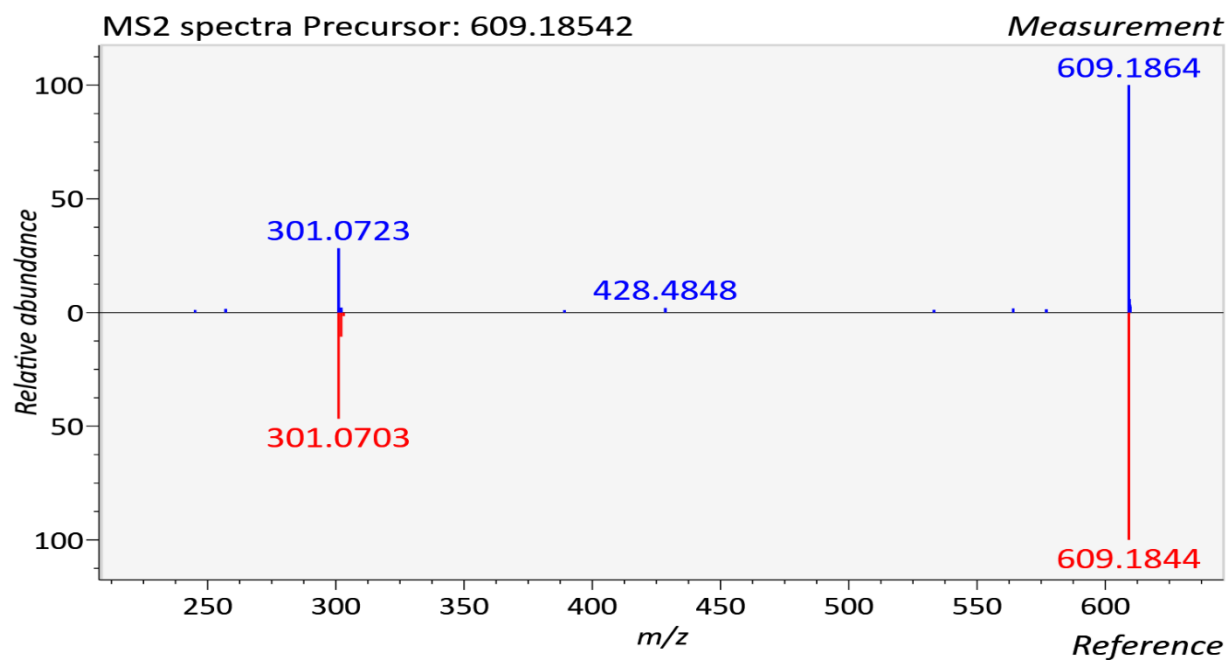

## Compound 57

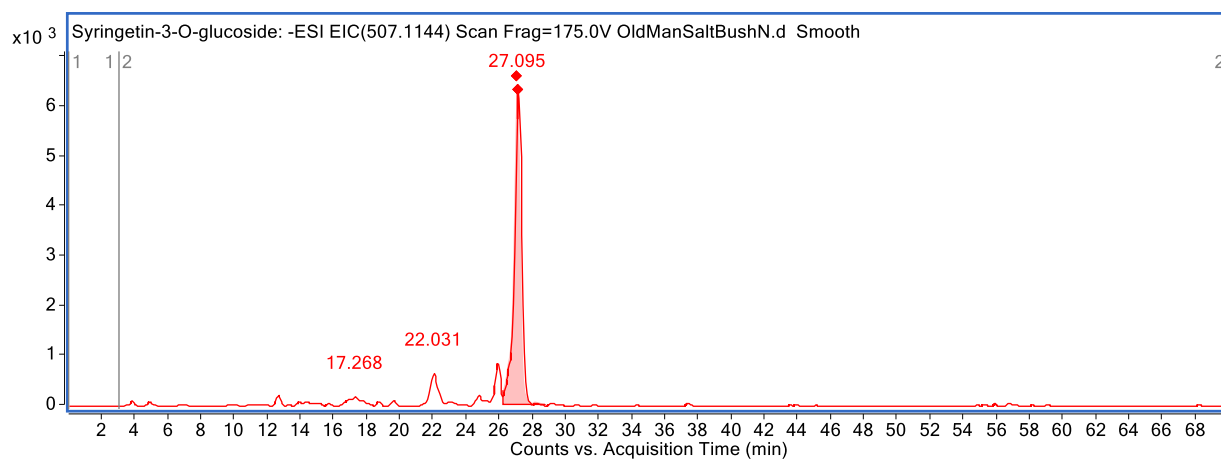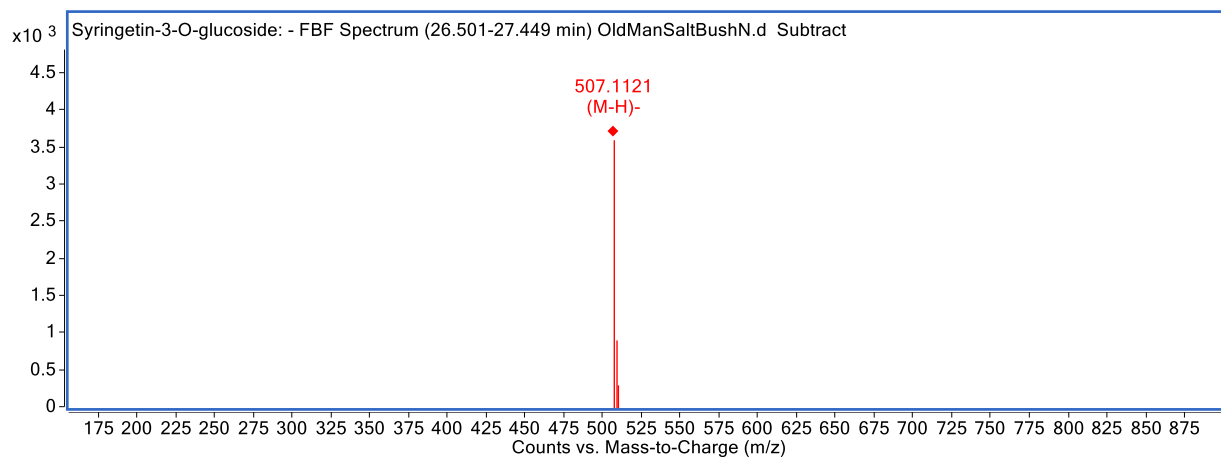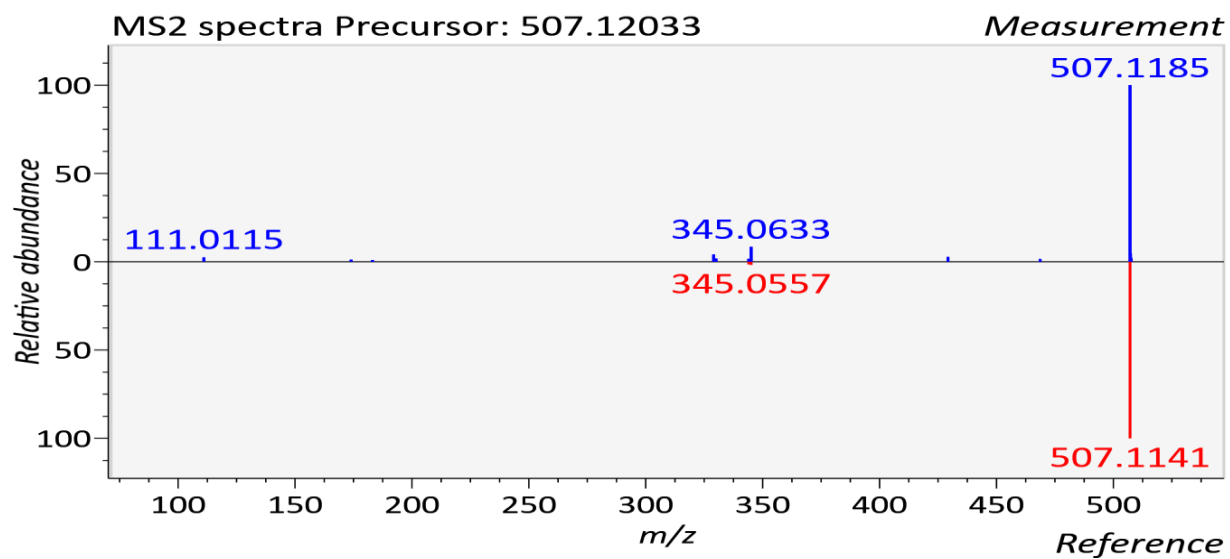

## Compound 65

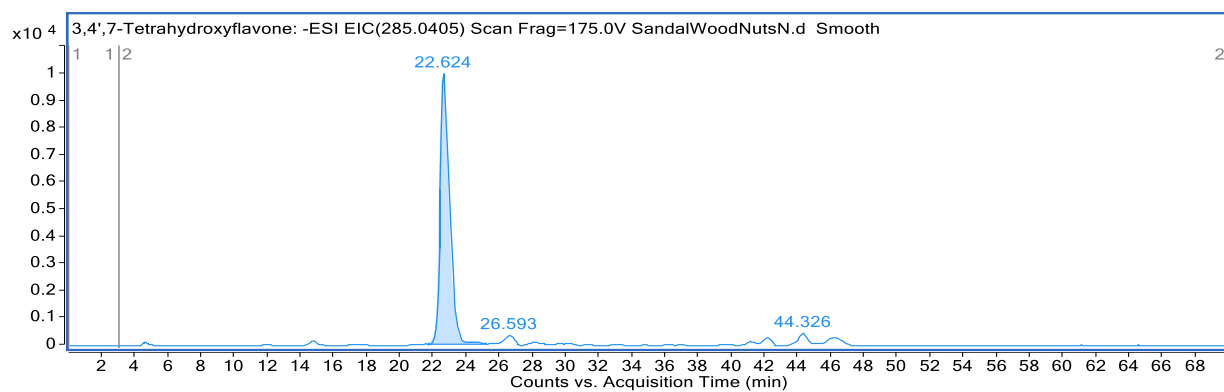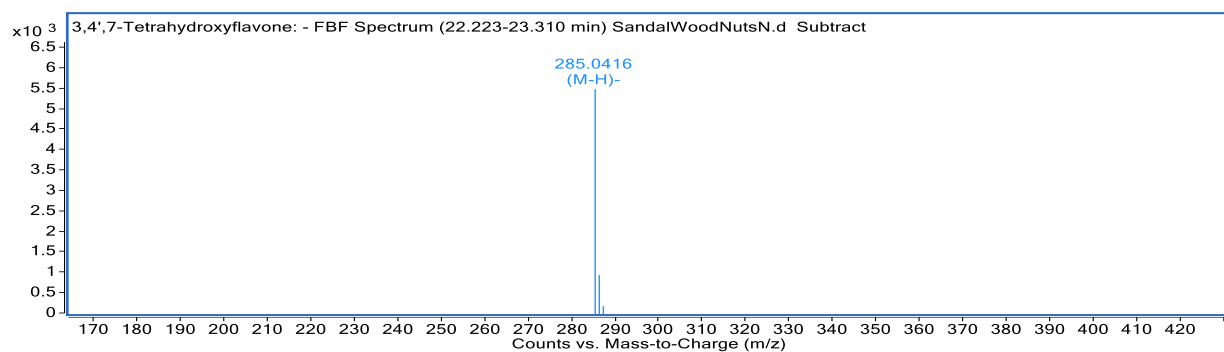

## Compound 125

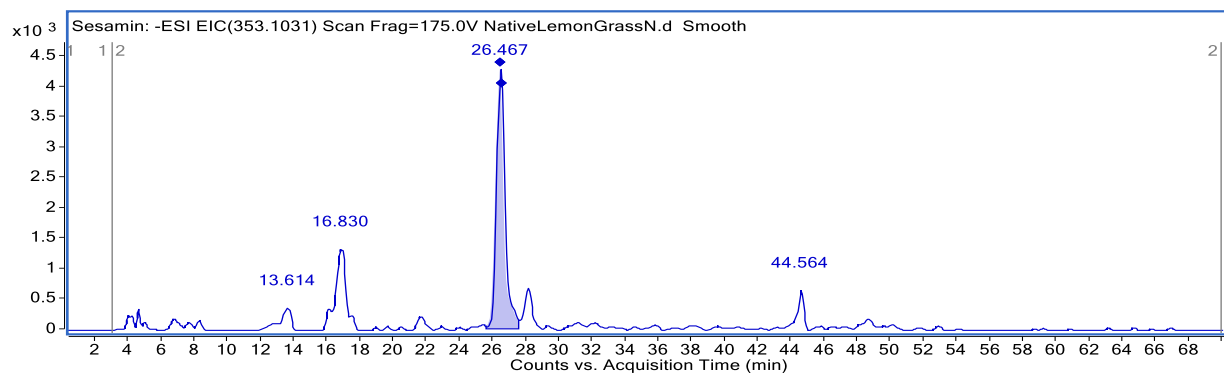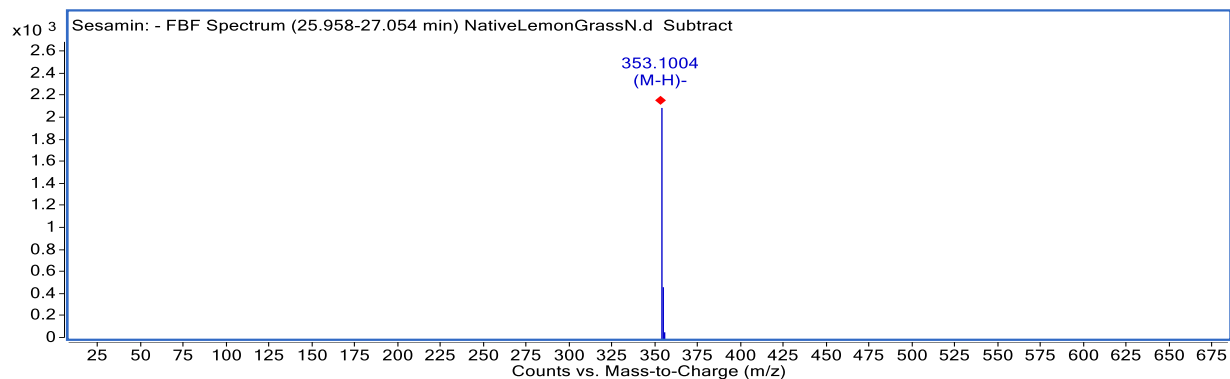

## Compound 138

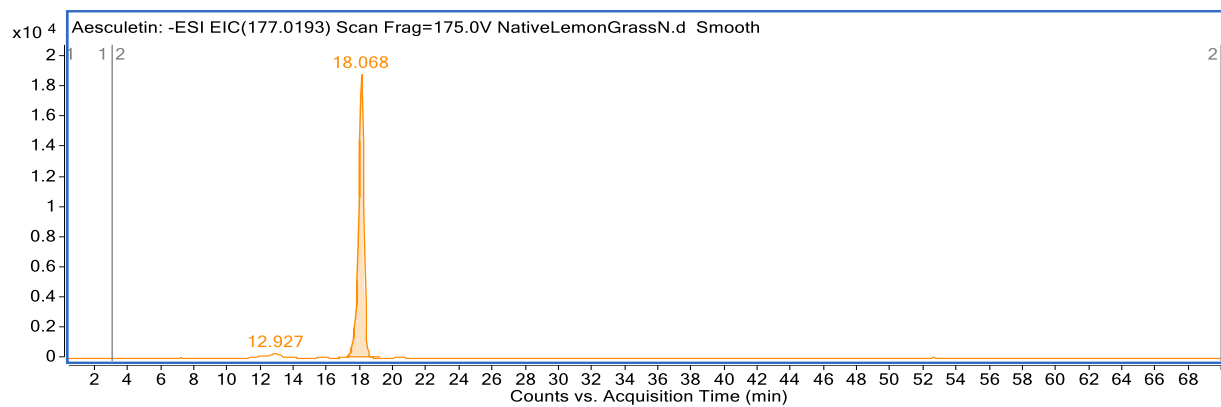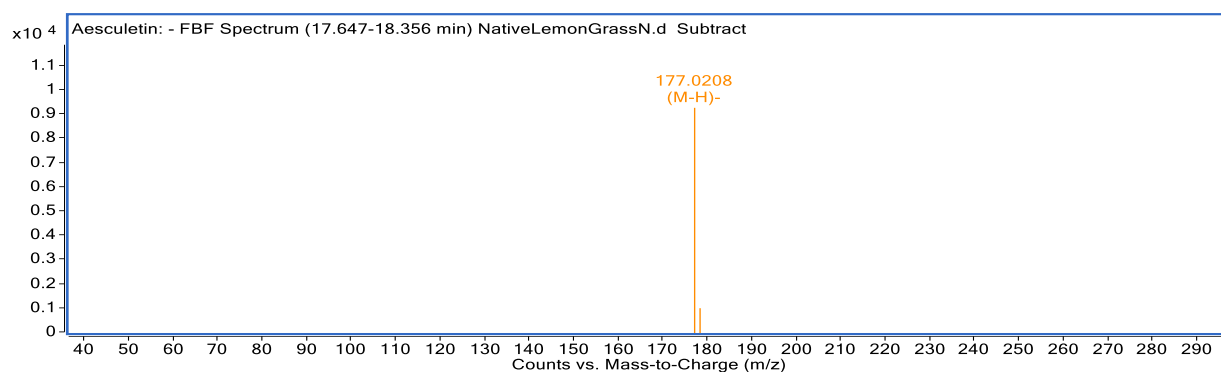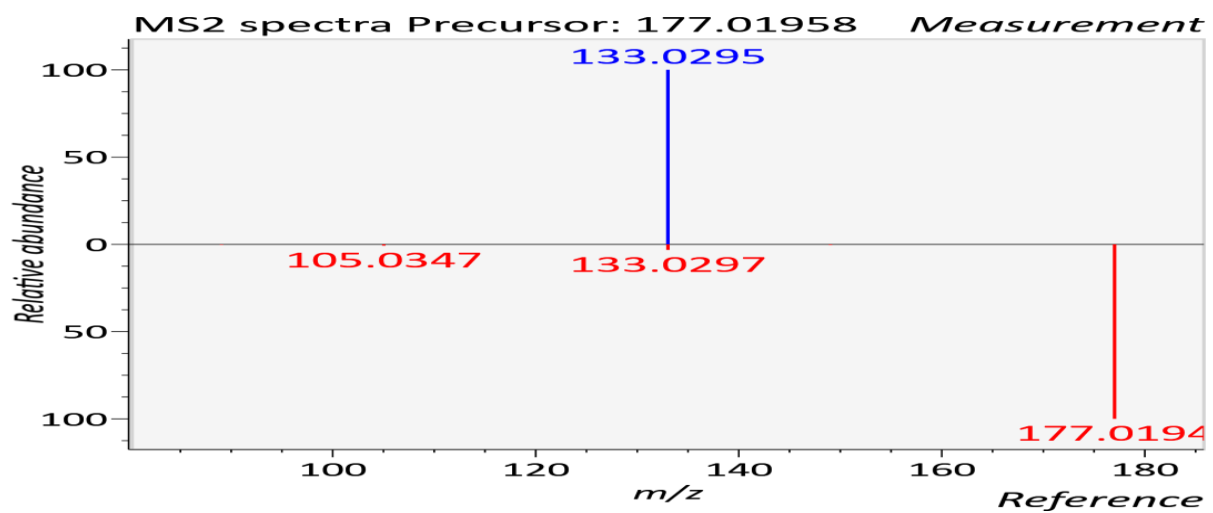

## Compound 145

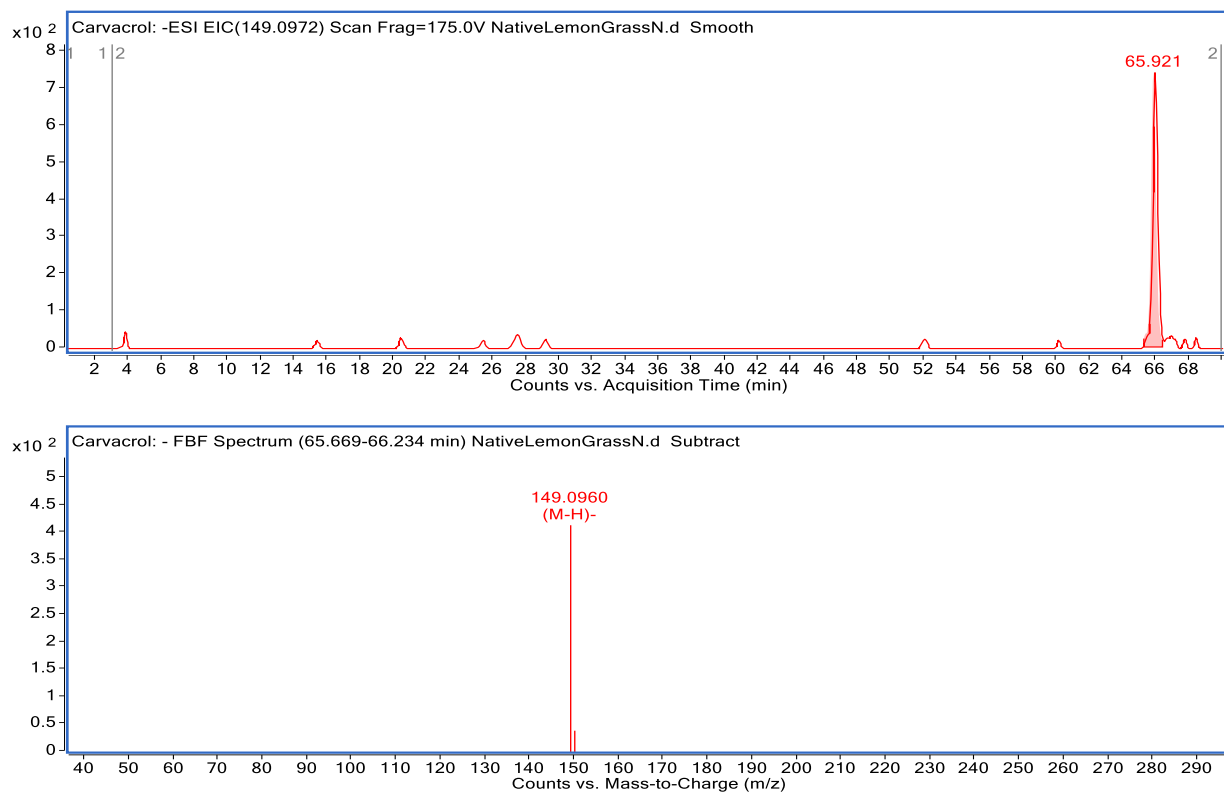

## Compound 151

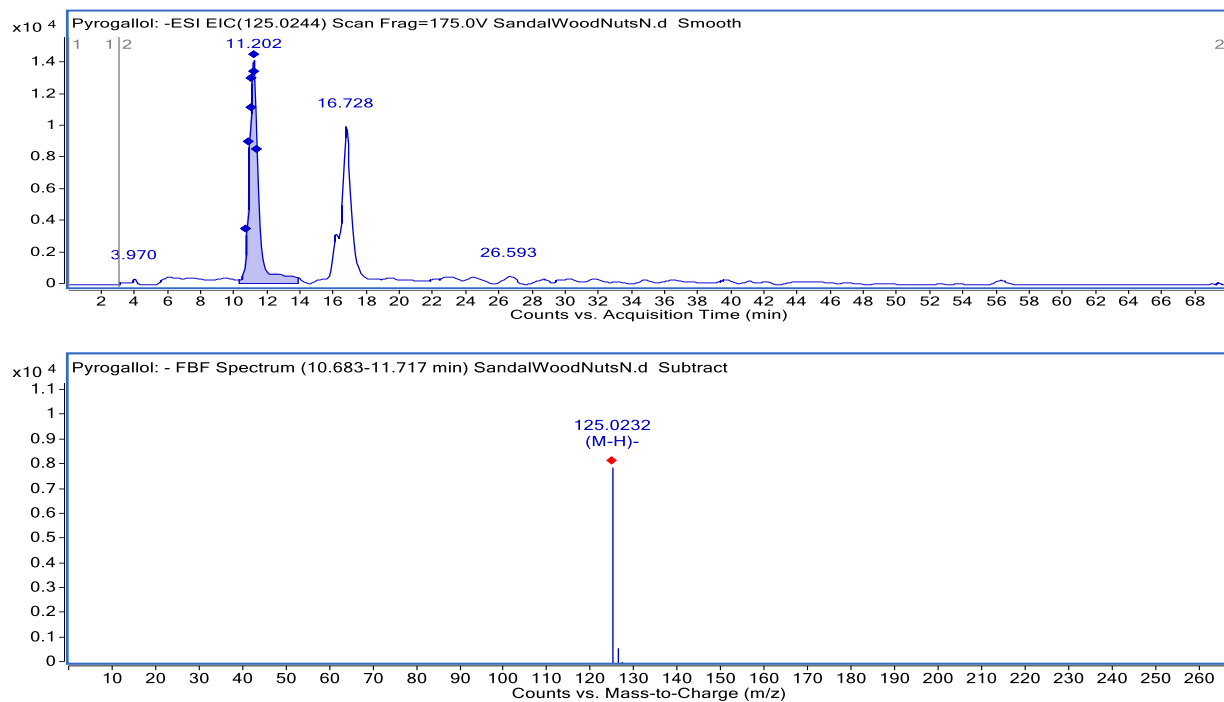

Figure S2. Chromatograms and mass spectra of some selected compounds

**Table S1.** Antioxidant activities of Australian native plants

| Variables        | DPPH<br>(mg AAE/g)       | ABTS<br>(mg AAE/g)        | FRAP<br>(mg AAE/g)        | •OH-RSA<br>(mg AAE/g)      | FICA<br>(mg EDTA/g)      | PMA<br>(mg AAE/g)         |
|------------------|--------------------------|---------------------------|---------------------------|----------------------------|--------------------------|---------------------------|
| Sandalwood Nuts  | 10.30 ± 0.9 <sup>b</sup> | 37.72 ± 1.40 <sup>d</sup> | 19.48 ± 3.04 <sup>a</sup> | 47.25 ± 0.95 <sup>b</sup>  | 1.56 ± 0.24 <sup>b</sup> | 14.43 ± 1.86 <sup>a</sup> |
| Lemongrass       | 18.73 ± 2.8 <sup>a</sup> | 98.81 ± 6.19 <sup>a</sup> | 14.55 ± 1.32 <sup>b</sup> | 104.34 ± 6.92 <sup>a</sup> | 2.48 ± 0.16 <sup>a</sup> | 12.88 ± 0.64 <sup>a</sup> |
| Oldman Salt Bush | 9.57 ± 0.1 <sup>b</sup>  | 74.76 ± 1.61 <sup>b</sup> | 5.62 ± 1.19 <sup>c</sup>  | 47.78 ± 0.35 <sup>b</sup>  | 1.50 ± 0.14 <sup>b</sup> | 10.88 ± 0.53 <sup>c</sup> |
| Wattle Seeds     | 8.03 ± 0.3 <sup>bc</sup> | 56.90 ± 2.90 <sup>c</sup> | 2.52 ± 1.97 <sup>d</sup>  | 19.25 ± 0.92 <sup>c</sup>  | 1.39 ± 0.03 <sup>b</sup> | 10.78 ± 0.69 <sup>c</sup> |

2,2'-azinobis-(3-ethylbenzothiazoline-6-sulfonic acid (ABTS), ferric reducing antioxidant power (FRAP), hydroxyl-radical scavenging activity (•OH-RSA), ferrous ion chelating assay (FICA), 2,2'-diphenyl-1-picrylhydrazyl (DPPH) and phosphomolybdate assay (PMA). Values (mean ± standard deviation; n=3) within the column are significantly different (p < 0.05) from each other represented by the superscript letters (a-d).

**Table S2.** Semi-quantification of phytochemical metabolites in Australian native plants (µg/g).

| No. | Compounds                     | LG             | WS           | OSB          | SWN           |
|-----|-------------------------------|----------------|--------------|--------------|---------------|
| 1   | Diosmin                       | 19.32 ± 5.47   | 11.04 ± 2.14 |              |               |
| 2   | Catechin                      | 19.23 ± 2.37   | 11.54 ± 3.07 |              |               |
| 3   | Procyanidin B2                | 46.75 ± 6.56   |              |              |               |
| 4   | Quercetin-3-glucoside         | 151.35 ± 11.34 | 26.43 ± 4.23 |              |               |
| 5   | Tricin                        | 12.34 ± 2.31   |              |              |               |
| 6   | Kaempferol-3-glucoside        | 21.45 ± 4.12   |              |              |               |
| 7   | Caffeic acid                  | 445.21 ± 32.77 |              |              | 78.95 ± 1.98  |
| 8   | Chlorogenic acid              | 377.65 ± 4.26  | 36.98 ± 6.91 | 18.76 ± 6.34 | 29.32 ± 5.86  |
| 9   | Cinnamic acid                 | 61.30 ± 17.31  |              |              |               |
| 10  | Quinic acid                   | 161.52 ± 17.62 | 39.64 ± 9.92 | 19.64 ± 3.92 |               |
| 11  | Sinapic acid                  |                |              |              | 77.17 ± 6.85  |
| 12  | Syringic acid                 |                |              |              | 17.04 ± 3.45  |
| 13  | Ferulic acid                  | 12.17 ± 3.11   |              |              |               |
| 14  | Gallic Acid                   |                | 18.53 ± 6.15 |              | 93.32 ± 18.44 |
| 15  | <i>p</i> -Coumaric acid       | 393.32 ± 39.56 |              |              | 58.63 ± 4.12  |
| 16  | <i>p</i> -Hydroxybenzoic acid | 94.01 ± 2.24   |              |              | 30.11 ± 3.43  |
| 17  | Protocatechuic acid           | 54.16 ± 3.65   |              |              | 91.61 ± 3.72  |
| 18  | Pyrogallol                    | 27.54 ± 5.76   | 18.59 ± 4.17 | 11.02 ± 1.63 |               |

Lemon grass (LG), Wattle Seeds (WS), Oldman saltbush (OSB), Sandalwood Nuts (SWN)
